# Supplementary material for: Uncovering Mechanisms of Zanthoxylum piperitum Fruits for the Alleviation of Rheumatoid Arthritis Based on Network Pharmacology
Source: MDPI journal article supplement (doi:10.3390/biology10080703), 2021-07-23
Supplement: s1 [file s1]

## **470 targets from SEA**

SQLE

GGPS1

FNTB

UMPS

TLR2

LPAR4

P2RY10

LPAR6

SLC25A20

GPR174

GPR34

LPAR3

POLM

ACER2

POLH

NDUFAB1

NDUFAF1

NDUFA1

NDUFA2

NDUFA3

NDUFA5

NDUFA6

NDUFA7

NDUFA8  
NDUFA9  
NDUFA10  
NDUFA11  
NDUFA12  
NDUFA13  
NDUFB1  
NDUFB2  
NDUFB3  
NDUFB4  
NDUFB5  
NDUFB6  
NDUFB7  
NDUFB8  
NDUFB9  
NDUFB10  
NDUFB11  
NDUFC1  
NDUFC2  
NDUFAF2  
NDUFAF3  
NDUFAF4  
NDUFS1  
NDUFS2

NDUFS3  
NDUFS4  
NDUFS5  
NDUFS6  
NDUFS7  
NDUFS8  
NDUFV1  
NDUFV2  
NDUFV3  
MT-ND1  
MT-ND2  
MT-ND3  
MT-ND4L  
MT-ND5  
MT-ND6  
NDUFA4L2  
PAM  
PLA2G5  
CES2  
POLK  
PPM1A  
GNAI1  
LPAR2  
NDUFA4

PLA2G2C  
CES1  
MT-ND4  
LPAR1  
GSTM1  
FDPS  
FAAH  
NOD1  
ACP1  
ENPP2  
GNAI3  
ADH1C  
EPHX1  
GNAO1  
FABP3  
VEGFA  
POLB  
NAAA  
POLL  
DNM1  
PLA2G4B  
ADH1B  
PLA2G2A  
PLCG2

SLC22A8  
POLA1  
SELP  
GSTA1  
LAP3  
HSD17B3  
PLA2G10  
EPHX2  
OXER1  
SLC22A6  
PRKCE  
ADH1A  
CYP4F2  
ADH7  
CDC25A  
HMGCR  
CDC25C  
RARB  
HAO1  
MSR1  
PPARA  
GPR84  
BBOX1  
KDM7A

GABRQ  
PHF8  
SLC25A20  
LPAR6  
CERT1  
MPEG1  
KDM2A  
PAOX  
SLCO2A1  
GSTK1  
BHMT  
S1PR2  
SLC6A11  
SMPD2  
SELL  
LTB4R  
SPTLC2  
KDM5A  
PTGER2  
CDC25B  
GSR  
THRB  
KDM4A  
S1PR3

TBXAS1  
ENPEP  
THRA  
S1PR4  
TBXA2R  
PRKCA  
FABP4  
KDM4E  
SPHK1  
PTGER4  
S1PR5  
FOLH1  
PTGIR  
DAGLA  
SLC22A1  
PPARG  
KDM4C  
GABBR2  
PTGER3  
GABBR1  
KDM5C  
GPR18  
PTGFR  
GABRR1

S1PR1  
ATG4B  
GBA  
FFAR4  
CPT2  
TRPV1  
GPR35  
PPARD  
PLA2G1B  
NAALAD2  
PAFAH1B2  
PDCD4  
CNR1  
LSS  
BTN3A1  
FNTA  
ADCYAP1R1  
RNASEH1  
GCGR  
TYR  
ICMT  
CXCL12  
NFE2L2  
CYP1B1



NR1H4  
GPR183  
ABCG2  
HDAC1  
HDAC8  
SEN2  
AKR1C2  
AKR1B10  
CHRNA10  
CHRNA9  
NFKB1  
RCOR3  
SEN1  
AKR1C3  
CYP1A1  
MAOB  
APP  
MYOC  
MMP1  
RELA  
HDAC6  
HDAC2  
MAPT  
MMP9

FABP1  
PPME1  
GLO1  
MMP2  
TNFRSF1A  
HDAC9  
GFPT1  
ABCB1  
TTR  
HDAC7  
HDAC11  
RBBP9  
TUBB1  
BCHE  
HDAC5  
CA6  
KCNK9  
IKBKG  
CA5B  
RHOA  
HDAC4  
FABP2  
JUN  
CA14

TRPM2  
ACP3  
TOP2A  
NLRP1  
AKR1B1  
CA5A  
CA7  
ATP6V1B1  
CYP27A1  
CYP24A1  
PARP15  
FOS  
DPYD  
CA3  
SENP7  
HDAC10  
ESR1  
CHAT  
BACE1  
MAOA  
ACHE  
HDAC3  
SLC37A4  
GRIK2

KCNK2  
AKR1C4  
STAT1  
NR0B1  
SLC12A2  
ALOX5  
GRIK1  
KCNA3  
TLR9  
F3  
MTNR1B  
CA9  
CYP1A2  
NLRP3  
HCAR2  
CA12  
IMPDH2  
AKR1C1  
IMPDH1  
SLC12A5  
HTR5A  
DHFR  
SENP6  
KCNQ3

HTR1E  
TAAR1  
MTNR1A  
PARP14  
APOBEC3A  
CYP2C19  
GLI2  
GLI1  
GPR174  
MGLL  
SPTLC1  
CNR2  
TOP1  
ALOX12  
HEXB  
HEXA  
GLB1  
ADH4  
CEL  
GLA  
LDLR  
CBS  
SLC22A2  
RAD52

GRM6  
GRM3  
GGH  
COL4A3BP  
PLA2G4C  
PLA2G4A  
KCNA1  
KCNA4  
PAOA  
KAT2B  
LY96  
GBA2  
FUT7  
IARS1  
ASAH1  
PGA5  
TLR4  
APEX1  
PTPN13  
PTPRC  
LPAR5  
CTBP2  
CPA3  
SLC7A5

SLC15A1  
CPA1  
USP4  
DNPEP  
USP5  
GLS  
RNPEP  
KCNA2  
MB  
CACNA1I  
P2RX4  
IL6ST  
AOC2  
ANPEP  
RPS27  
CTRB1  
CDC42  
LTA4H  
FUCA1  
CACNA1H  
KLK6  
NOX1  
CAPN2  
FFAR1

SLC18A2  
CACNA1G  
SCN4A  
SIGMAR1  
KDM4D  
CAPNS1  
CELA1  
P2RX1  
SLC1A1  
SCN2A  
YARS1  
SRD5A2  
CXCR3  
TDP1  
G6PC  
GRM4  
DHCR24  
EBP  
NPC1L1  
ABCC2  
ALDH1A1  
SPHK2  
GAK  
CREB1



AXIN2  
FSHR  
STK17B  
KCND3  
LYPLA2  
GRK6  
LYPLA1  
ODC1  
HCK  
GUSB  
PDE4B  
PI4KB  
ERN1  
RAD51  
PDE4D  
CYP17A1  
CRYAB  
SHBG  
SERPINA6  
GPBAR1  
GC  
SLC10A1  
FGF2  
G6PD

SRD5A1  
VDR  
NR1H3  
CD4  
NPC1  
SLC10A2  
ABCC4  
ST3GAL1  
ADCY10  
ESR2  
AR  
RORA  
SREBF2  
ABCB11  
SHH  
EPHA7  
EPHA5  
CYP19A1  
EPHA8  
EPHB3  
EPHA4  
EPHA1  
EPHB1  
EPHA6

EPHB2  
EPHA2  
EPHB6  
EPHA3  
CA1  
GABRD  
CA2  
NR1H2  
SLC22A3  
RORC  
IL2  
CDC45  
HSD3B1  
HSD11B2  
NR3C1  
NR3C2  
ATIC  
EDNRB  
EDNRA  
PTPRE  
GPER1  
CYP27B1  
FGF1  
UGCG

UGT2B7  
CYP51A1  
SLC6A2  
PTPN1  
SLC6A4  
CHRM2  
GLRA1  
PTGER1  
HSD11B1  
PTGES  
DHCR7  
PTPN6  
NR1I3  
FDFT1  
NOS2

















## **629 targets from STP**

PPARA

CNR2

AR

CYP19A1

ESR1

ESR2

SERPINA6

SHBG

HSD17B3

HSD11B1

G6PD

GABBR1

SLC22A6

FNTA

VDR

NPC1L1

NR1H4

GABRA2

POLB

CDC25A

GPBAR1

AKR1B10

FABP4

FABP3  
FABP5  
PPARD  
FFAR1  
FABP2  
UGT2B7  
CHRNA7  
HSD11B2  
KDM2A  
PHF8  
KDM5C  
HMGCR  
PTGER2  
PTGFR  
GABRB2  
GABRG2  
CA2  
CA1  
ADRA2A  
ADRA2B  
F2  
PRSS1  
PDE10A  
ACHE

CTSH  
PAM  
ADRA2C  
ADRA1A  
ADORA1  
ADORA2A  
ELANE  
PTPN1  
CA9  
FKBP1A  
PLA2G6  
NISCH  
CTRC  
CYP11B1  
CYP11B2  
CTRB1  
CCR1  
CCR5  
CCR8  
C1R  
KCNK2  
TGFR1  
IDO1  
TRPM8

MAOA  
ADORA2B  
ADORA3  
MET  
FAAH  
GABRB3  
ALOX15  
P2RX7  
CRHR1  
TNKS2  
ALDH3A1  
HSP90AB1  
PIK3CD  
ADRA1D  
MAOB  
TAAR1  
PDGFRA  
PSMB1  
JAK3  
JAK2  
TRPA1  
PTAFR  
PRKCE  
PRKCQ

PRKCH  
PRKCG  
EGFR  
PIM1  
ICAM1  
LIPE  
SELE  
GABRA5  
PDGFRB  
PIK3R1  
RXRA  
RARA  
RARG  
RARB  
SLC16A1  
CA12  
PTGER1  
DHODH  
RXRG  
AKR1C3  
SRD5A2  
CCR2  
PTGS2  
STS



MARS  
RXRB  
CHRM1  
FFAR4  
TOP1  
HPGD  
TRPV1  
SRD5A1  
ADH1A  
ADH1B  
ADH7  
HLCS  
PGR  
DRD2  
SIGMAR1  
DRD4  
PTGS1  
ALDH1A1  
CTSK  
CTSL  
CTSB  
ABCG2  
SIRT2  
PPARG

MTNR1A  
MTNR1B  
ADH1C  
PSEN2  
CTSD  
FABP1  
HDAC6  
HDAC1  
MMP13  
PARP1  
MMP1  
CACNA1B  
PSMB5  
CCND1  
MMP8  
IKBKB  
EPHX2  
JAK1  
DBF4  
HTR2A  
PSENEN  
NCSTN  
APH1A  
PSEN1

APH1B  
CDC7  
CDK4  
TYR  
DAO  
SLC6A4  
CHRM2  
SLC6A2  
BCHE  
NR1H3  
CA4  
SREBF2  
RORA  
TRPV3  
SQLE  
HSD17B2  
ATP12A  
PTPN6  
PTPN2  
CYP2C19  
NR3C1  
SAE1  
AKR1B1  
PLG

GSTK1  
CDC45  
HAO1  
CACNA2D1  
PTGDR2  
GRM5  
PTGES  
FDFT1  
FNTB  
UBA2  
S1PR3  
GABRA1  
GRM1  
CTSV  
HSP90AA1  
GRK2  
CNR1  
F3  
CYP27A1  
OPRM1  
HSD17B1  
NR3C2  
NAAA  
ASAH1

TGM2  
TSPO  
DBF4 CDC7  
MAPK10  
DYRK1A  
CA7  
NQO2  
PIK3CA  
DYRK2  
DYRK1B  
KDR  
SLC18A3  
AVPR2  
CYP24A1  
HCRTR2  
HCRTR1  
CYP17A1  
MYLK  
GRK6  
SCN4A  
KCNA5  
MMP9  
MMP2  
MAPK9

PIM3  
GABRA3  
GABRA6  
NR1I2  
NR1I3  
MAPK3  
PTPN11  
BACE1  
SLC6A3  
CES1  
CHRNA4  
CHRNA2  
RORC  
TERT  
CYP51A1  
KCNA3  
SCD  
KCNH2  
HTR7  
LTA4H  
CXCL8  
PTPRC  
NOTUM  
DUSP3

BCAT2  
PTGER3  
PTGDR  
FADS1  
MAPK14  
BRD2  
GSK3B  
CDK2  
EPHX1  
IMPDH2  
ADRA1B  
BRD4  
HRH3  
HRH4  
EED  
PIM2  
BRD3  
HTR2C  
DRD3  
NR4A1  
SLC27A1  
SUZ12  
EZH2  
GABRA4

CEL  
TNNC1  
GSTP1  
GSTM2  
HSPA1A  
PTK2B  
DGAT1  
TNNT2  
TNNI3  
PREP  
PDE4D  
PTPRF  
PLA2G1B  
ACP1  
SLC22A12  
CD81  
LTB4R  
NOS2  
CES2  
PDPK1  
ITGAL  
TOP2A  
BBOX1  
ITGB2



PLA2G2A  
TBXA2R  
EPAS1  
NLRP3  
AKR1C2  
AKR1C1  
ALDH2  
METAP1  
LSS  
ABCC1  
VCAM1  
PLA2G7  
NPY5R  
HTT  
TBXAS1  
TAS2R31  
HMOX1  
IDH1  
PRKDC  
PRKCD  
QPCT  
CYP2A6  
FLT3  
CXCR2

BCL2L1  
F2R  
ALOX5  
LRRK2  
CSF1R  
GRM2  
BRAF  
ABHD6  
MGLL  
HTR6  
SLC8B1  
CCNB3  
CDK1  
TMIGD3  
CCNE1  
CDK5  
HPRT1  
ABCC9  
KCNJ11  
UTS2R  
PLAU  
AURKA  
CDK5R1  
TUBB1

RAPGEF4

ERBB2

PGGT1B

CCNB1

CCNB2

GSR

AOC3

HCAR2

CA14

TLR4

KLKB1

CHRNA3

CA3

CA6

CA5B

CA5A

CHRM5

BRD9

CA13

CHRNA4

CHRM3

CHRM4

OPRD1

OPRK1

SCN5A  
SCN9A  
TYK2  
TYMS  
MAPK8  
KCNE1  
ACPP  
STK3  
PRKCA  
CCNE2  
PTK2  
CYP2C9  
LIPA  
STK26  
CDC25B  
TTR  
MAP3K8  
CSNK2A1  
ABAT  
MCL1  
BCL2  
MDM2  
MMP12  
PDE4A

THRA  
THRB  
BMP1  
CMA1  
CTSG  
CYP1A2  
EDNRA  
MMP14  
VCP  
RPA1  
ACE  
MMP3  
CTNNB1  
GCGR  
PER2  
SLC10A2  
PDE2A  
TTL  
AVPR1A  
PABPC1  
IL6ST  
CYP3A4  
PRCP  
OXTR

NR1H2  
TNK2  
CASR  
GABBR2  
CCR9  
BRS3  
ICMT  
LYPLA2  
PRKCB  
NOS1  
NPY2R  
HIF1A  
RASGRP1  
GCK  
OPRL1  
GLUL  
PYGL  
C5AR1  
GLI2  
GLI1  
ROCK2  
GAA  
HSD3B1  
PTGIR

PTGER4  
ALOX12  
PDE4B  
VEGFA  
FGF1  
FGF2  
HPSE  
LGALS4  
LGALS3  
LGALS8  
HEXA  
HEXB  
OGA  
CDA  
ADA  
HTR2B  
DRD1  
CYP2D6  
HTR1B  
FUCA1  
PYGM  
ADK  
PNP  
TK1

LIG1  
KDM4E  
STAT3  
PTPRG  
KDM5A  
KDM5B  
MIF  
KDM4C  
SLC16A3  
CXCR3  
DNM1  
RORB  
MAPK1  
RBP4  
PLA2G4A  
CYP26B1  
CYP26A1  
KEAP1  
PTGES2  
ACLY  
FOLH1  
AKR1A1  
GLRA1  
NR0B2



GBA  
SHH  
LDHA  
MSR1  
GPR35  
PDE7A  
KMT5A  
FGFR1  
ALPL  
DHFR  
CPA1  
ABL1  
CCNA1  
CCNA2  
CPT1A  
MPEG1  
SLC1A1  
GRIN2B  
DCK  
ABCB1  
HNF4A  
MPO  
KAT2B  
TDO2

PIN1  
NQO1  
HPGDS  
HDAC8  
AHR  
CTSC  
SLC18A2  
HTR5A  
KDM1A  
HRH1  
ADRB1  
HTR1A  
PNMT  
HTR1D  
HTR1E  
SLC6A9  
SLC9A1  
GRIN1  
KIF11  
ROCK1  
CLK4  
CLK1  
CLK2  
CLK3

KDM4A  
ACACA  
ACACB  
QPCTL  
AURKB  
ADRB3  
TACR1  
KCNN4  
TRPC6  
TRPC3  
S1PR1  
TACR3  
TNKS  
TLR9  
DNMT3A  
CTSS  
TACR2  
G6PC  
TRPV4  
NMBR  
PIK3CB  
PIK3CG  
LPAR6  
LPAR5

IL2  
AKT1  
PPM1B  
PPP1CC  
PPP5C  
PPP1CA  
S1PR5  
S1PR4  
FASN  
GPR119  
IKBKE  
TBK1  
GRM4  
CYP1B1  
GHSR  
HDAC3  
HDAC2  
PDE3A  
PDE3B  
TTK  
PHOSPHO1  
EPHB4  
SMO  
CACNA2D2

PLAT  
KIT  
MTOR  
TNFRSF1A  
CCNC  
CDK8  
ATM  
SCN2A  
SCN10A  
RPS6KB1  
GAK  
CSNK2A2  
DYRK3  
PLEC  
TAB1  
CCND3  
MAP3K7  
CCND2  
ENPP2  
LPAR3  
LPAR2  
LPAR1  
LPAR4  
PFKFB3

POLA1

MME

ECE1

VHL

EDNRB

DHCR7

**215 overlapping targets between SEA and**

PPARA

CNR2

AR

CYP19A1

ESR1

ESR2

SERPINA6

SHBG

HSD17B3

HSD11B1

G6PD

GABBR1

SLC22A6

FNTA

VDR

NPC1L1

NR1H4

POLB

CDC25A

GPBAR1

AKR1B10

FABP4

FABP3

PPARD  
FFAR1  
FABP2  
UGT2B7  
HSD11B2  
KDM2A  
PHF8  
KDM5C  
HMGCR  
PTGER2  
PTGFR  
CA2  
CA1  
ACHE  
PAM  
PTPN1  
CA9  
CTRB1  
KCNK2  
MAOA  
FAAH  
MAOB  
TAAR1  
PRKCE



RARB  
CA12  
PTGER1  
AKR1C3  
SRD5A2  
FFAR4  
TOP1  
TRPV1  
SRD5A1  
ADH1A  
ADH1B  
ADH7  
SIGMAR1  
ALDH1A1  
ABCG2  
PPARG  
MTNR1A  
MTNR1B  
ADH1C  
FABP1  
HDAC6  
HDAC1  
MMP1  
EPHX2

TYR  
SLC6A4  
CHRM2  
SLC6A2  
BCHE  
NR1H3  
SREBF2  
RORA  
SQLE  
PTPN6  
CYP2C19  
NR3C1  
AKR1B1  
GSTK1  
CDC45  
HAO1  
PTGES  
FDFT1  
FNTB  
S1PR3  
CNR1  
F3  
CYP27A1  
NR3C2

NAAA  
ASAH1  
CA7  
CYP24A1  
CYP17A1  
GRK6  
SCN4A  
MMP9  
MMP2  
NR1I3  
BACE1  
CES1  
RORC  
CYP51A1  
KCNA3  
LTA4H  
PTPRC  
PTGER3  
EPHX1  
IMPDH2  
CEL  
PDE4D  
PLA2G1B  
ACP1

LTB4R  
NOS2  
CES2  
TOP2A  
BBOX1  
PLA2G2A  
TBXA2R  
NLRP3  
AKR1C2  
AKR1C1  
LSS  
TBXAS1  
ALOX5  
MGLL  
TUBB1  
GSR  
HCAR2  
CA14  
TLR4  
CA3  
CA6  
CA5B  
CA5A  
PRKCA

CDC25B  
TTR  
THRA  
THRB  
CYP1A2  
EDNRA  
GCGR  
SLC10A2  
IL6ST  
NR1H2  
GABBR2  
ICMT  
LYPLA2  
GLI2  
GLI1  
HSD3B1  
PTGIR  
PTGER4  
ALOX12  
PDE4B  
VEGFA  
FGF1  
FGF2  
HEXA

HEXB  
FUCA1  
KDM4E  
KDM5A  
KDM4C  
CXCR3  
DNM1  
PLA2G4A  
FOLH1  
GLRA1  
GBA  
SHH  
MSR1  
GPR35  
DHFR  
CPA1  
MPEG1  
SLC1A1  
ABCB1  
KAT2B  
HDAC8  
SLC18A2  
HTR5A  
HTR1E

KDM4A  
S1PR1  
TLR9  
G6PC  
LPAR6  
LPAR5  
IL2  
S1PR5  
S1PR4  
GRM4  
CYP1B1  
HDAC3  
HDAC2  
TNFRSF1A  
SCN2A  
GAK  
ENPP2  
LPAR3  
LPAR2  
LPAR1  
LPAR4  
POLA1  
EDNRB  
DHCR7











































**nd STP**
