# Supplementary material for: Uncovering Mechanisms of Zanthoxylum piperitum Fruits for the Alleviation of Rheumatoid Arthritis Based on Network Pharmacology
Source: MDPI journal article supplement (doi:10.3390/biology10080703), 2021-07-23
Supplement: s1 [file s1]

## **101 targets against RA**

PPARA

CNR2

AR

CYP19A1

ESR1

ESR2

SHBG

HSD11B1

G6PD

GABBR1

VDR

GPBAR1

AKR1B10

FABP3

PPARD

HSD11B2

HMGCR

PTGER2

CA2

CA1

PAM

CTRB1

MAOA

MAOB

RARB

TRPV1

ALDH1A1

ABCG2

PPARG

MTNR1B

HDAC6

HDAC1

MMP1

TYR

SLC6A4

SLC6A2

BCHE

RORA

PTPN6

CYP2C19

NR3C1

AKR1B1

GSTK1

PTGES

S1PR3

CNR1

F3

ASAH1

CYP17A1

GRK6

MMP9

MMP2

NR1I3

RORC

KCNA3

PTPRC

PDE4D

PLA2G1B

ACP1

LTB4R

NOS2

CES2

PLA2G2A

NLRP3

ALOX5

GSR

TLR4

CA3

PRKCA

TTR

CYP1A2

EDNRA

IL6ST

GABBR2

GLI1

PTGER4

ALOX12

PDE4B

VEGFA

FGF1

FGF2

HEXA

HEXB

CXCR3

PLA2G4A

SHH

GPR35

DHFR

CPA1

ABCB1

S1PR1

TLR9

IL2

HDAC3

TNFRSF1A

ENPP2

LPAR3

LPAR2

LPAR1

EDNRB

DHCR7
